# Supplementary figures and images for: Model calibration and streamflow simulations for the extreme drought event of 2018 on the Rhine River Basin using WRF-Hydro 5.2.0
Source: Copernicus journal article supplement (doi:10.5194/gmd-2024-134), 2024-08-19

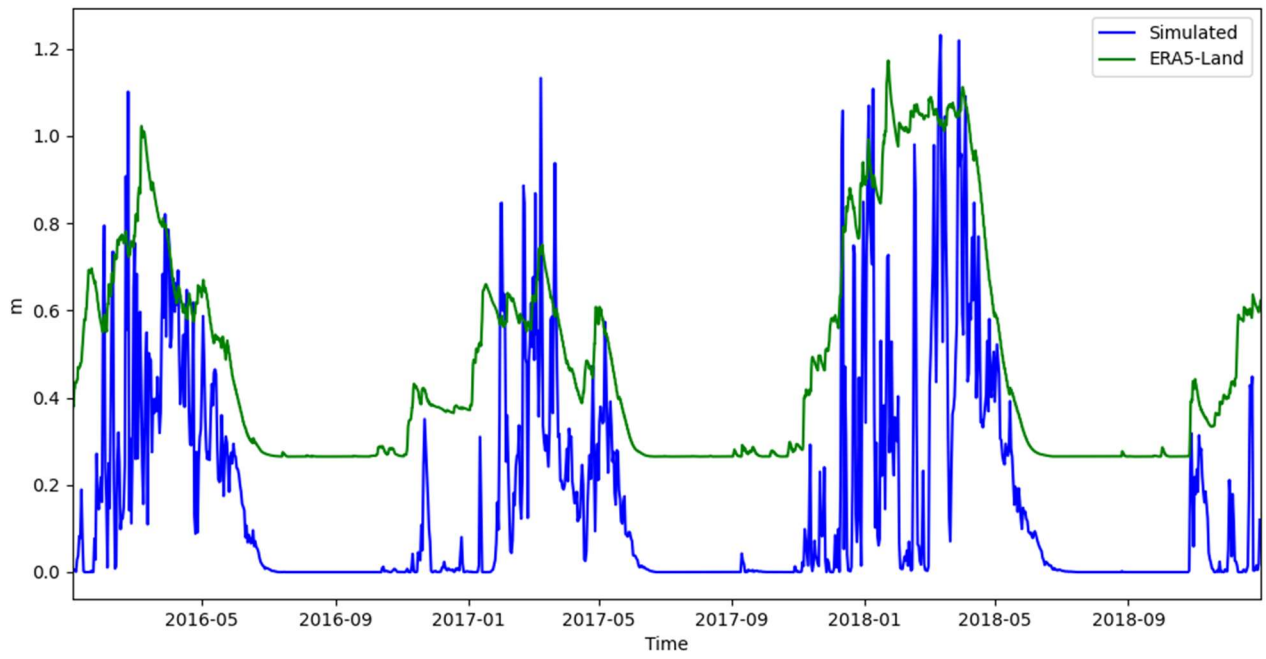

**Fig S1. Spatial daily mean snow depth from WRF-Hydro output (blue) and ERA5-Land dataset (green).**

Supplement: Supplementary file 1 [file gmd-2024-134-supplement.pdf]
